# Supplementary material for: Facile preparation and the stepwise formation mechanistic investigation of gram-scale nitrogen-doped graphene quantum dots
Source: Royal Society of Chemistry journal article supplement (doi:10.1039/c7tc02434g), 2017-01-01
Supplement: c7tc02434g1.pdf [file c7tc02434g1.pdf]

Facile preparation and the stepwise formation mechanistic  
investigation of gram-scale nitrogen-doped graphene quantum  
dots

*Renbing Tian,<sup>a</sup> Suting Zhong,<sup>a</sup> Juan Wu,<sup>a</sup> Yongliang Gen,<sup>b</sup> Baojing Zhou,<sup>b</sup> Qinghua  
Wang<sup>\*c</sup> and Wei Jiang<sup>\*a</sup>.*

a. National Special Superfine Powder Engineering Technology Research Center, Nanjing  
University of Science and Technology, 210094, Nanjing, China. E-mail:  
superfine\_jw@126.com

b. Nanjing University of Science and Technology, 210094, Nanjing, China.

c. No. 763 military representative office, Taiyuan, E-mail:wqh001@tom.com

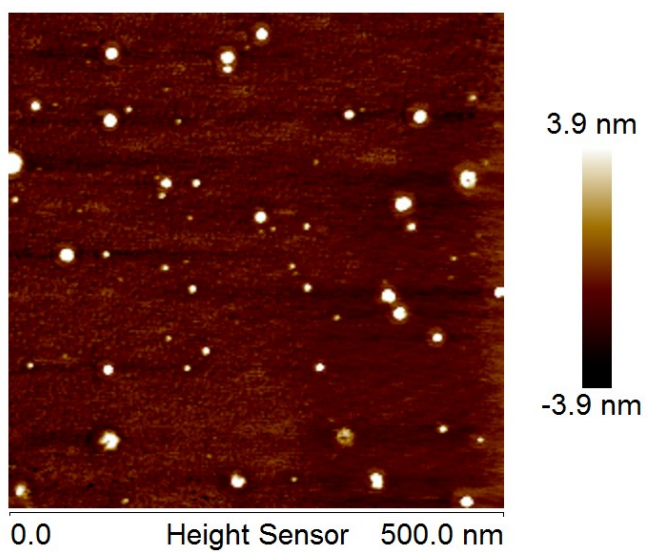

Fig. S1 AFM image of N-doped GQDs with reaction time for 1.5h.

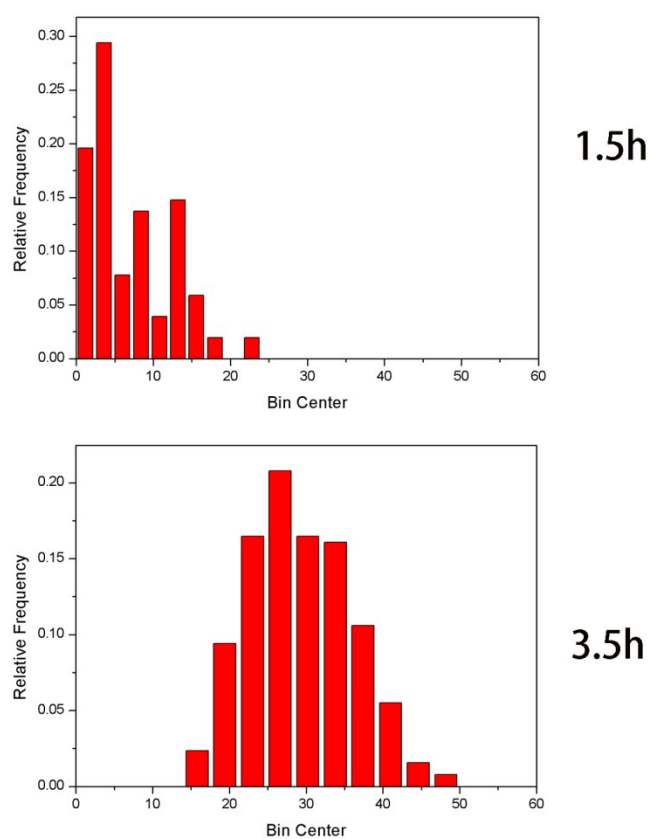

Fig. S2 comparison of size distribution between N-doped GQDs reacted for 1.5h and 3.5h.

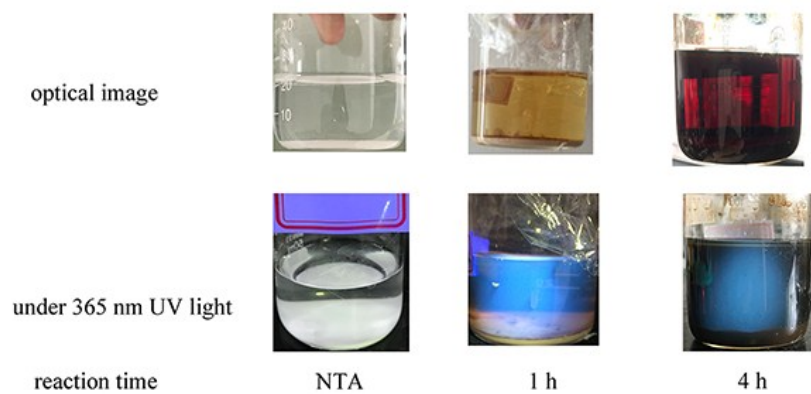

Fig S3. Images after different reaction time in daylight and 365 nm UV light. Label paper on the beaker was used to show the existing of UV light because it contained fluorescent substance.

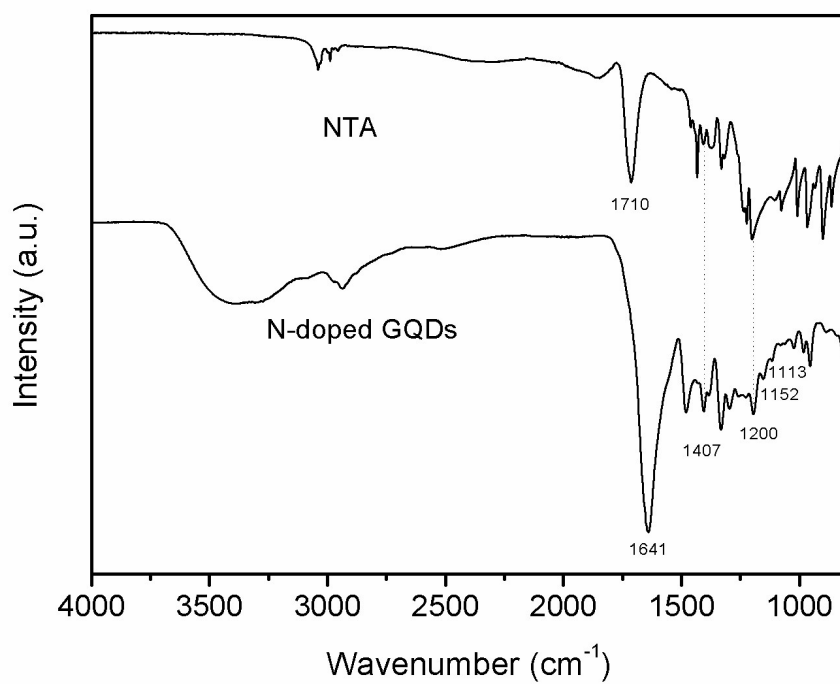

Fig. S4 FT-IR spectra of NTA and N-doped GQDs

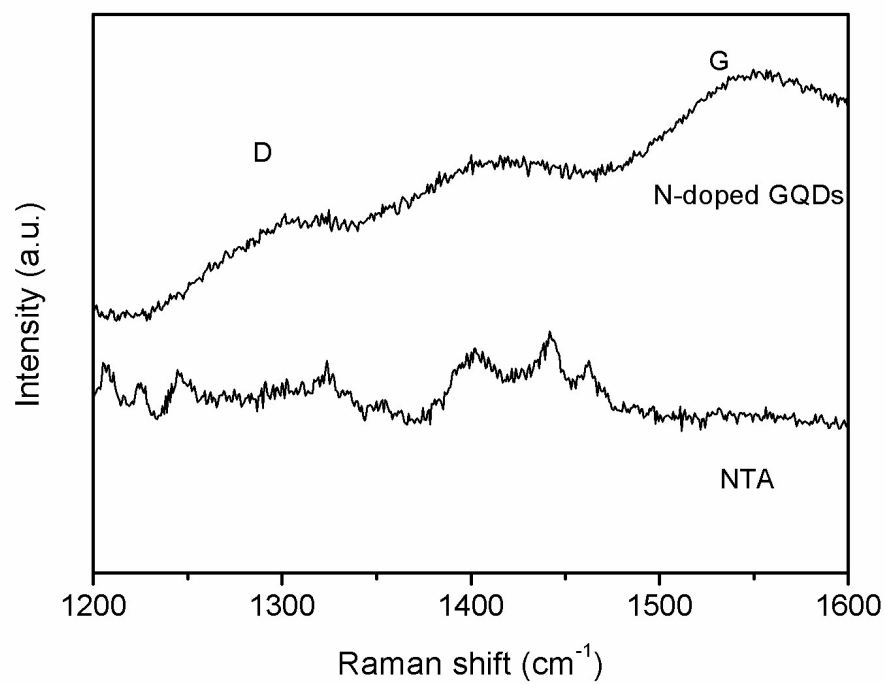

Fig. S5 Raman spectra of NTA and N-doped GQDs

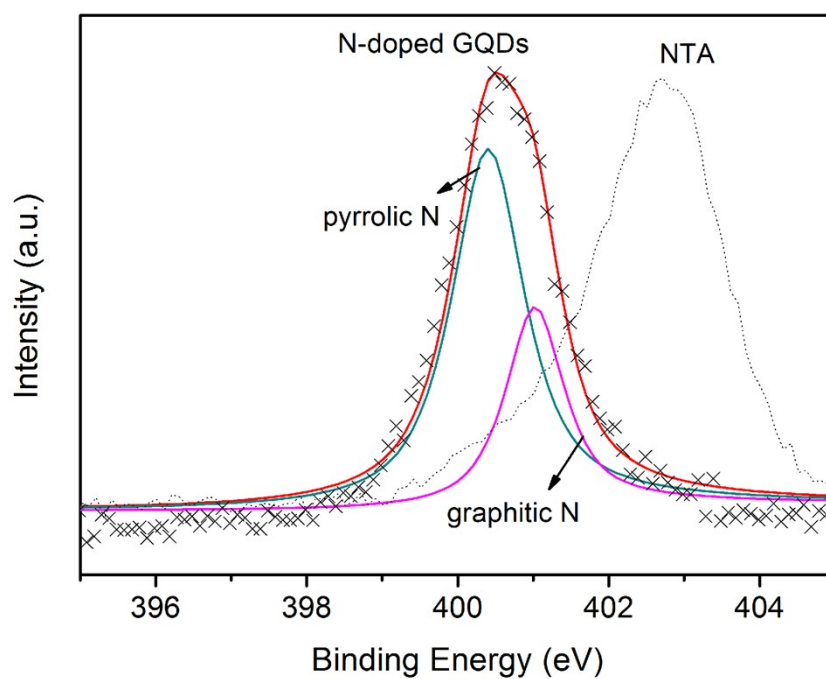

Fig. S6 High resolution XPS spectra of N 1s for N-doped GQDs and NTA.

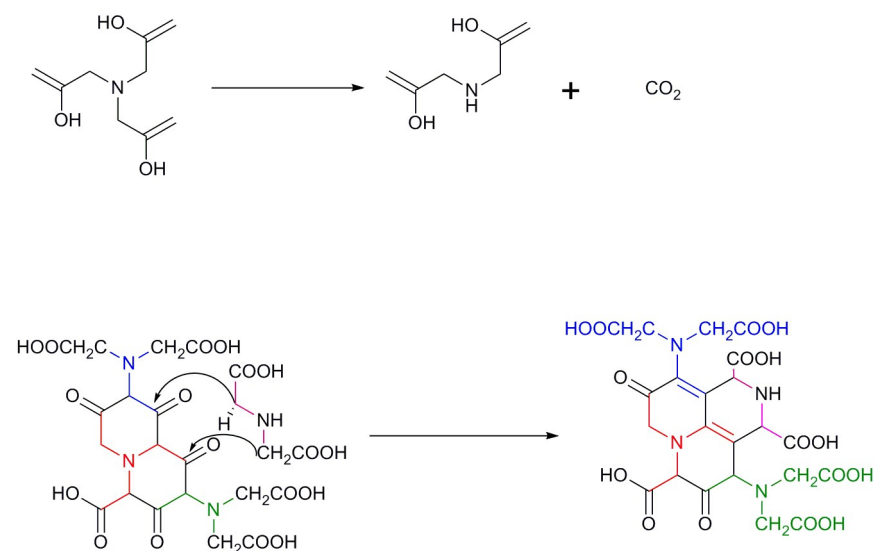

Fig. S7 The formation mechanism of pyrrolic N, which introduce defect to N-doped GQDs plane.

Table S1 Quantum yields (QYs)

| Sample          | Integrated emission intensity (F) | Absorption (A) | Refractive index of solvent (G) | Quantum yields (Y%) |
|-----------------|-----------------------------------|----------------|---------------------------------|---------------------|
| Quinine sulfate | 440137870                         | 0.04418        | 1.33                            | 57.7                |
| GQDs            | 575830365                         | 0.072702       | 1.33                            | 45.8                |

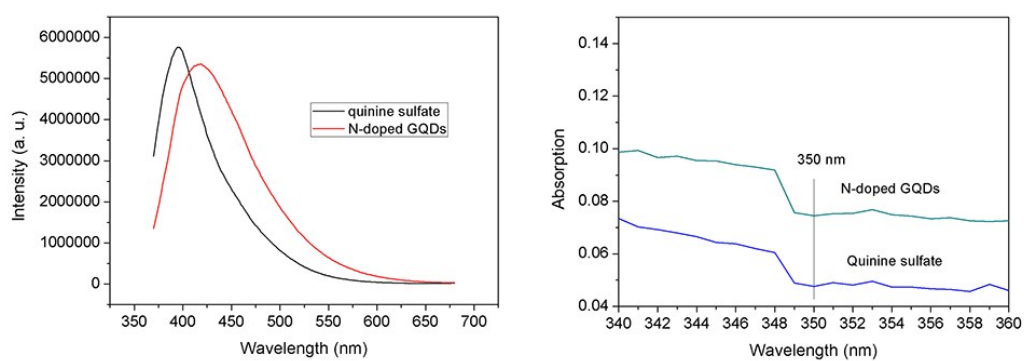

Fig. S8 FL spectrum and UV-vis spectrum of N-doped GQDs and quinine sulfate for quantum yield measurement.

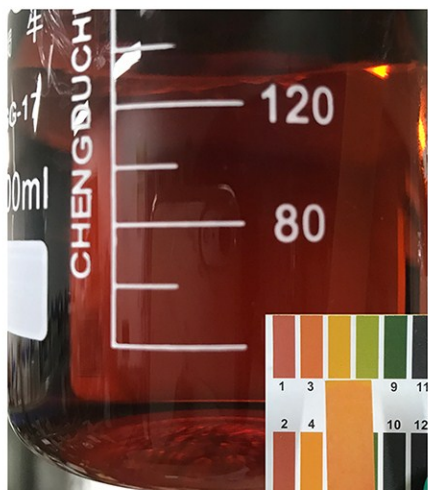

Fig. S9 The pH measure of saturated aqueous solution of N-doped GQDs.

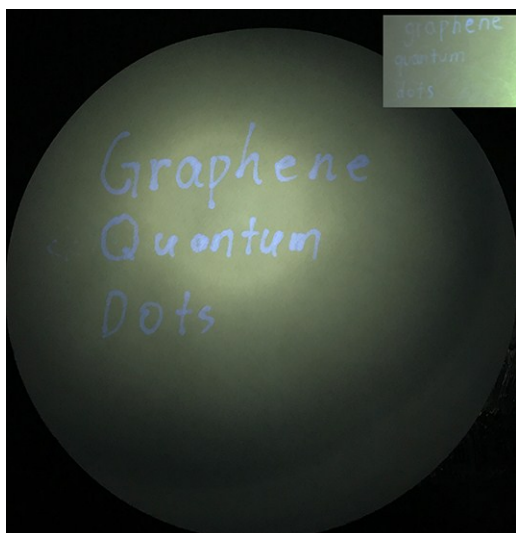

Fig. S10 Image of aqueous FL ink after 24 h of heat treatment at 100 °C. Inset was oil-like FL ink in the same condition.

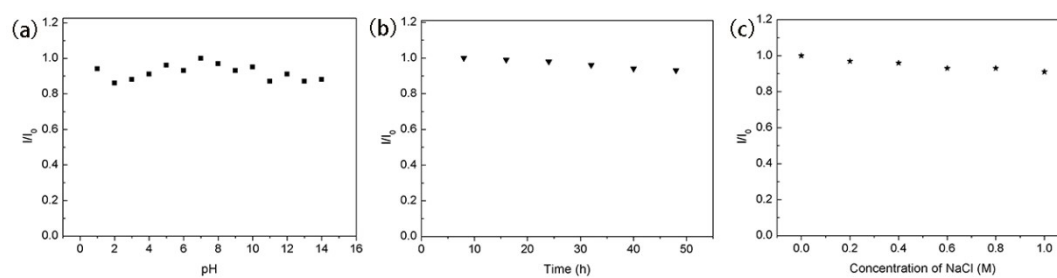

Fig. S11 FL intensity of N-doped GQDs at diverse pH (a), different irradiation time at

365 nm UV light (b) and different concentration of sodium chloride (c).
